# Supplementary material for: Hypoxia Increases Epithelial Permeability in Human Nasal Epithelia
Source: PubMed Central journal article supplement — Yonsei Med J. 2015 Apr 1;56(3):825–31. doi: 10.3349/ymj.2015.56.3.825 (PMC4397456; doi:10.3349/ymj.2015.56.3.825), 2015-04-01
Supplement: ymj-56-825-s001.pdf [file ymj-56-825-s001.pdf]

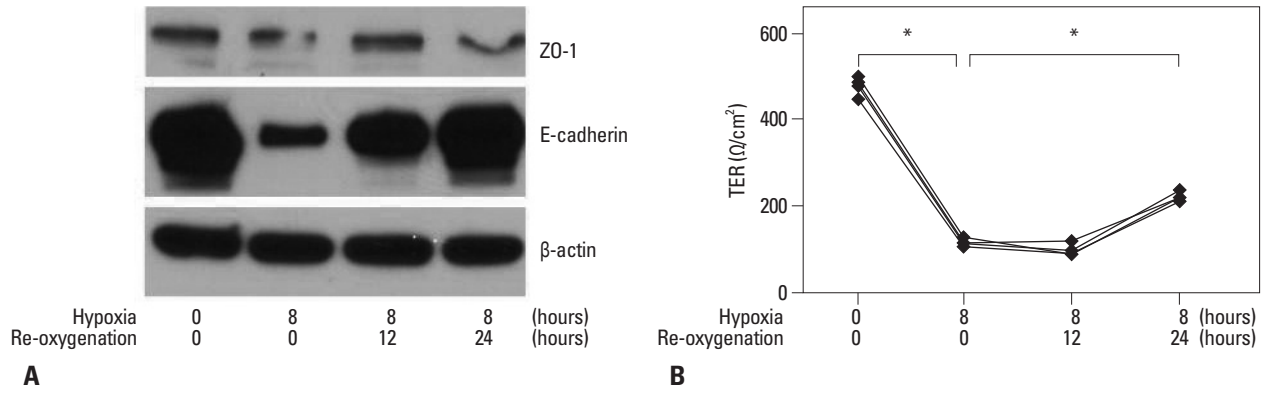

**Supplementary Fig. 1.** Re-oxygenation after hypoxic incubation restored the barrier function in NHNE cells. (A) NHNE cells were incubated under hypoxic conditions for 8 hours, and then re-oxygenated for 0, 12, 24 hours. Western blotting was performed to assess the expressions of ZO-1, and E-cadherin. (B) NHNE cells were incubated under hypoxic conditions for 8 hours, and then re-oxygenated for 0, 12, 24 hours. TER values were measured immediately. The mean TER values of control, hypoxia, re-oxygenation for 12 hours after hypoxia, and re-oxygenation for 24 hours after hypoxia were  $479.97 \pm 21.45$ ,  $114.50 \pm 9.53$ ,  $99.50 \pm 14.38$ , and  $221.75 \pm 11.95$ , respectively ( $n=4$ ,  $*p < 0.01$ ). TER, trans-epithelial resistance; NHNE, normal human nasal epithelial.
